# Supplementary material for: Characterization and Genetic Diversity of Bacillus cereus Strains Isolated from Baby Wipes
Source: MDPI journal article supplement (doi:10.3390/microorganisms10091779), 2022-09-03
Supplement: s1 [file s1]

Supplemental Table S2. Biochemical carbohydrate fermentation test.

| ISOLATES MOD1 |            | CARBOHYDRATE |         |                                                                |                                            |         |              |         |  | N-Acetyl-D-glucosamine |         |
|---------------|------------|--------------|---------|----------------------------------------------------------------|--------------------------------------------|---------|--------------|---------|--|------------------------|---------|
|               |            | D-Ribose     | DAY (+) | Methyl <i>α</i> -D-glucopyroside (unit of Cyclodextrin DAY (+) | Methyl <i>β</i> -D-glucopyroside (Arbutin) | DAY (+) | Cyclodextrin | DAY (+) |  |                        | DAY(+)  |
| SubA          | MOD1_Bc54  | (+)          | 1-7 (+) | (-)                                                            | (-)                                        |         | (+)          | 4       |  | (+)                    | 1-7 (+) |
| SubB          | MOD1_Bc55  | (+)          |         | (-)                                                            | (-)                                        |         | (+)          | 5       |  | (+)                    |         |
| SubC          | MOD1_Bc56  | (+)          |         | (-)                                                            | (-)                                        |         | (+)          | 5       |  | (+)                    |         |
| SubD          | MOD1_Bc57  | (+)          |         | (-)                                                            | (-)                                        |         | (+)          | 7*      |  | (+)                    |         |
| SubE          | MOD1_Bc58  | (+)          |         | (-)                                                            | (-)                                        |         | (+)          | 5       |  | (+)                    |         |
| SubF          | MOD1_Bc59  | (+)          |         | (-)                                                            | (-)                                        |         | (+)          | 4       |  | (+)                    |         |
| SubG          | MOD1_Bc60  | (+)          |         | (-)                                                            | (-)                                        |         | (+)          | 4       |  | (+)                    |         |
| SubH          | MOD1_Bc61  | (+)          |         | (-)                                                            | (-)                                        |         | (+)          | 4       |  | (+)                    |         |
| SubI          | MOD1_Bc62  | (+)          |         | (-)                                                            | (-)                                        |         | (+)          | 5       |  | (+)                    |         |
| SubJ          | MOD1_Bc63  | (+)          |         | (-)                                                            | (-)                                        |         | (+)          | 5       |  | (+)                    |         |
| SubK          | MOD1_Bc64  | (+)          |         | (-)                                                            | (+)                                        | 3       | (+)          | 4       |  | (+)                    |         |
| SubL          | MOD1_Bc65  | (+)          |         | (-)                                                            | (-)                                        |         | (+)          | 4       |  | (+)                    |         |
| SubM          | MOD1_Bc177 | (+)          |         | (-)                                                            | (-)                                        |         | (+)          | 5       |  | (+)                    |         |
| SubN          | MOD1_Bc178 | (+)          |         | (-)                                                            | (-)                                        |         | (+)          | 4       |  | (+)                    |         |
| SubO          | MOD1_Bc179 | (+)          |         | (-)                                                            | (-)                                        |         | (+)          | 7*      |  | (+)                    |         |
| SubP          | MOD1_Bc180 | (+)          |         | (-)                                                            | (-)                                        |         | (+)          | 5       |  | (+)                    |         |
| SubQ          | MOD1_Bc181 | (+)          |         | (-)                                                            | (-)                                        |         | (+)          | 5       |  | (+)                    |         |
| SubR          | MOD1_Bc182 | (+)          |         | (-)                                                            | (-)                                        |         | (+)          | 5       |  | (+)                    |         |
| SubS          | MOD1_Bc183 | (+)          |         | (-)                                                            | (-)                                        |         | (+)          | 4       |  | (+)                    |         |
| SubT          | MOD1_Bc184 | (+)          |         | (-)                                                            | (-)                                        |         | (+)          | 4       |  | (+)                    |         |

|             |            |     |     |     |     |   |     |
|-------------|------------|-----|-----|-----|-----|---|-----|
| SubU        | MOD1_Bc185 | (+) | (-) | (-) | (+) | 4 | (+) |
| SubV        | MOD1_Bc186 | (+) | (-) | (+) | 2   | 4 | (+) |
| SubW        | MOD1_Bc187 | (+) | (-) | (-) | (+) | 4 | (+) |
| SubX        | MOD1_Bc188 | (+) | (-) | (-) | (+) | 4 | (+) |
| SubY        | MOD1_Bc189 | (+) | (-) | (-) | (+) | 4 | (+) |
| SubZ        | MOD1_Bc190 | (+) | (-) | (-) | (+) | 5 | (+) |
| SubAA       | MOD1_Bc191 | (+) | (-) | (-) | (+) | 4 | (+) |
| SubBB       | MOD1_Bc192 | (+) | (-) | (-) | (+) | 4 | (+) |
| SubCC       | MOD1_Bc193 | (+) | (-) | (-) | (+) | 4 | (+) |
| SubDD       | MOD1_Bc194 | (+) | (-) | (+) | 4   | 5 | (+) |
| SubEE       | MOD1_Bc195 | (+) | (-) | (+) | 3   | 5 | (+) |
| SubFF       | MOD1_Bc196 | (+) | (-) | (-) | (+) | 5 | (+) |
| SubGG       | MOD1_Bc197 | (+) | (-) | (-) | (+) | 5 | (+) |
| SubHH       | MOD1_Bc198 | (+) | (-) | (+) | 3   | 4 | (+) |
| SubII       | MOD1_Bc199 | (+) | (-) | (-) | (+) | 5 | (+) |
| SubJJ       | MOD1_Bc200 | (+) | (-) | (-) | (+) | 5 | (+) |
| SubKK       | MOD1_Bc201 | (+) | (-) | (+) | 3   | 5 | (+) |
| SubLL       | MOD1_Bc202 | (+) | (-) | (-) | (+) | 5 | (+) |
| SubMM       | MOD1_Bc210 | (+) | (-) | (-) | (+) | 5 | (+) |
| SubNN       | MOD1_Bc204 | (+) | (-) | (-) | (+) | 5 | (+) |
| <hr/>       |            |     |     |     |     |   |     |
| (+) Control | 14579      | (+) |     |     |     |   |     |
| (-) Control | 14579      | (-) |     |     |     |   |     |

\*Phenotypic results of carbohydrate utilization after 7 consecutive days indicated by a color change from red to yellow in the media.
