# Supplementary material for: Characterization and Genetic Diversity of Bacillus cereus Strains Isolated from Baby Wipes
Source: MDPI journal article supplement (doi:10.3390/microorganisms10091779), 2022-09-03
Supplement: s1 [file s1]

Supplemental Table S1. PCR primers used for multiplex PCR detection of enterotoxin genes in *B. cereus* isolates

| Target gene  | Primer <sup>a</sup> | Primer sequence (5'–3') | Primer size (bp) | <i>T</i> <sub>m</sub> (°C) | Product size (bp) | Primer concentration (μM) | Reference            |
|--------------|---------------------|-------------------------|------------------|----------------------------|-------------------|---------------------------|----------------------|
| <i>hblC</i>  | FHbIC               | CCTATCAATACTCTCGCAA     | 19               | 54                         | 695               | 0.4                       | Ngamwongsatit, 2008  |
|              | RHbIC               | TTTCCTTTGTTATACGCTGC    | 20               | 56                         |                   |                           |                      |
| <i>hblD</i>  | FHD                 | GAAACAGGGTCTCATATTCT    | 20               | 56                         | 1018              | 0.4                       | Thaenthanee, 2004    |
|              | RHD2                | CTGCATCTTTATGAATATCA    | 20               | 52                         |                   |                           |                      |
| <i>hblA</i>  | FHbIA               | GCAAAATCTATGAATGCCTA    | 20               | 54                         | 884               | 0.4                       | Ngamwongsatit, 2008  |
|              | RHbIA               | GCATCTGTTCGTAATGTTTT    | 20               | 54                         |                   |                           |                      |
| <i>nheA</i>  | F2NheA              | TAAGGAGGGGCAAACAGAAG    | 20               | 60                         | 759               | 0.2                       | Ngamwongsatit, 2008  |
|              | RNheA               | TGAATGCGAAGAGCTGCTTC    | 20               | 60                         |                   |                           |                      |
| <i>nheB</i>  | F2NheB              | CAAGCTCCAGTTCATGCGG     | 19               | 60                         | 935               | 0.2                       | Ngamwongsatit, 2008T |
|              | RNheB               | GATCCCATTTGTGTACCATTG   | 20               | 58                         |                   |                           |                      |
| <i>nheC</i>  | FNheC               | ACATCCTTTTGCAGCAGAAC    | 20               | 58                         | 618               | 0.2                       | Ngamwongsatit, 2008  |
|              | R2NheC              | CCACCAGCAATGACCATATC    | 20               | 60                         |                   |                           |                      |
| <i>cytK</i>  | FCytK               | CGACGTCACAAGTTGTAACA    | 20               | 58                         | 565               | 0.2                       | Ngamwongsatit, 2008  |
|              | R2CytK              | CGTGTGTAAATACCCCAGTT    | 20               | 58                         |                   |                           |                      |
| <i>entFM</i> | FEntFM              | GTTCGTTTCAGGTGCTGGTAC   | 20               | 62                         | 486               | 0.2                       | Ngamwongsatit, 2008  |
|              | REntFM              | AGCTGGGCCTGTACGTA CTT   | 20               | 62                         |                   |                           |                      |

<sup>a</sup>

F = forward primer; R = reverse primer.
